# Supplementary material
Source: publisher figshare collection journal article supplement (https://asha.figshare.com/articles/dataset/_/15094257)
Supplement: Supplementary file 1 [file 1]

**Supplemental Material S3.** Posttraining open-ended interview questions (see Table 3 for a list of the Likert scale, posttraining, interview questions 9-15).

1. Tell us about going through the telepractice speech device trainings. What was that like for you?
2. What else about the experience stood out to you?
3. Each training was about two hours long. How did that length of time work for you?
4. After the two trainings did you feel prepared to use, set up and customize the SGD independently?
5. If additional training could be available, would you be interested? Why or why not? If yes, what would you like the training to cover?"
6. Would you be open to doing additional trainings via telepractice? Why or why not?
7. How well or in what ways has the communication equipment and strategies been meeting your communication needs? Can you provide an example or two?
8. What are some of your unmet communication needs at this time?
