# Supplementary material
Source: publisher figshare collection journal article supplement (https://asha.figshare.com/articles/dataset/_/15094257)
Supplement: Supplementary file 2 [file 1]

**Supplemental Material S2.** Postevaluation open-ended interview questions (see Table 2 for the Likert scale, post evaluation, interview questions 4-10).

1. Tell me about going through the telepractice speech device evaluation. What was that like for each of you?
2. What else about the process stood out to you?

**Follow up questions if not addressed during responses to questions 1 and 2**

**Pros/Cons**

- Did being in your home/facility for the evaluation provide any **benefits** to you as the **patient**, please tell me about them?
  - Did being in your home/facility for the evaluation **present** any **challenges** or disadvantage to you as the patient, please tell me about them?
  - How about for the **caregivers**? Were there any **benefits** to receiving the evaluation in the home/facility?
  - Did being in the home/facility for evaluation present any **challenges** or disadvantages for you as the **caregiver/s**?
3. Each evaluation session was about 90 minutes. How did that length of time work for each of you?
  11. Are there any recommendations you haven't mentioned yet, that could move this experience closer to a perfect 10 for both of you?

**Questions About Services Prior to Study**

12. Let's go back a little bit to before you heard about this telepractice opportunity. What was your experience trying to find speech generating device services like this evaluation?  
Additional prompts if needed:
  - Did your physician or some other individual let you know about speech generating devices? Did they explain the services required to receive a speech generating device?
  - Was someone able to direct you to a provider who could help you obtain speech generating device and services?
  - Were you able to have your needs met in a timely manner?
13. You responded on your pre-evaluation questionnaire that you **did** receive speech therapy services in the past. (ONLY ASK IF RESPONDED YES TO QUESTION 29 ON PRE-EVALUATION INTERVIEW) To clarify, you received services through
  - a home health agency?
  - outpatient services?
  - ALS Clinic or
  - at a facility or hospital where you resided?

14. You responded that you had worked on \_\_\_\_\_

\_\_\_\_\_ with the speech therapist.

I wanted to check in with you if you had worked on any of the following and, if you did, please tell me a little about what you did.

1. Exercises to strengthen the muscles responsible for speech?
2. Strategies for being better understood?
3. Message or voice banking?
4. Low tech alternative communication techniques like use of paper communication boards? (If YES) Please describe the board or strategy trained.
5. Adapted call chime or baby monitor for getting the attention of someone when you have a need?
6. Did the speech therapist provide any education and information about speech generating device?
7. Did you receive any speech generating device trials (during which you actually tried out a device?)
8. Were you provided with any other services from the speech therapist? What were they?
